# Supplementary material for: Effects of combined immunosuppressant and hepatitis B virus antiviral use on COVID-19 vaccination in recipients of living donor liver transplantation
Source: PeerJ. 2024 Dec 6;12:e18651. doi: 10.7717/peerj.18651 (PMC11627077; doi:10.7717/peerj.18651)
Supplement: Supplemental Information 5 [file peerj-12-18651-s005.xlsx]

## Sheet: Fig 2
	Healthy control
Pre-vaccinate	1.708	2.033	2.73	2.293	1.908	2.153	2.89	2.313	7.955	1.7	5.735	3.123	2.37	2.79	2.29	1.7	2.108	2.218	3.68	8.883	1.715	2.715	1.633	4.625	2.09	6.363	4.765	5.283	4.14	1.583	4.575	1.7	2.06	1.64	2.155	1.7		2.623	1.405	3.323	1.883	2.855	3.698	1.803	3.535	3.153	2.088	1.723	7.34
1st dose	136.825	241.225	27.125	223.913	55.073	205.588	18.64	124.513	60.2	44.12	87.113	908.875	137.725	32.443	115.213	168.875	184.4	56.265	21.615	55.884	133.55	145.213	15.779	54.344	218.238	237.65	28.261	31.269	50.969	18.776	181.738	59.033	214.4	43.308	246.913	52.214	117.588	541.463	32.103	233.325	132.513	234.113	126.275	60.616	240.85	111.738	338.163	139.975	184.588
2nd dose	159.275	136.025	46.544	134.825	201.563	133.9	120.85	243.125	208.038	104.188	287.95	171	198.875	255.588	89.75	358.975	168.763	152.988	221.863	227.663	66.725	179.788	24.216	44.659	287.725	222.55	79.313	79.638	145.388	156.338	117.5	184.6	229.488	471.25	43.318	281.736	266.4	171.863	83.475	252.563	348.225	201.788	328.625	165.488	421.875	522.5	264.225	240.2	136.2
3rd dose	7869	6802	11373	10326	8985	3457	3929	5186	3087		11503	9081	3163	4967	9535	3229	4093	2395	4484	3905	2643	4687	3794	4009	1659	6412	3092	5021	3324	6215	4270	5478	6169	3054	7706	8568	5585	2760	4787	5039	3780	6026	3757	5683	7755			4195
6 Mo
[truncated: 171 more columns]

## Sheet: Fig 3
	Vaccinated immunocompromised Pre Vaccinated
ALT	22	8	13	9	17	53	6	10	8	35	36	8	21	11	13	6	21	20	18	40	9	5	14	21	63	10	17	14	21	18	6	10	5	14	10	25	32
AST	16	20	26	23	28	34	22	18	18	38	56	19	20	35	19	34	15	23	19	27	17	31	23	28	37	17	22	15	30	23	16	21	20	31	31	32	18
TBIL	1	0.6	0.5	0.4	0.8	0.3	0.9	0.9	0.9	0.3	1.1	0.3	0.9	0.7	1.1	0.6	0.5	0.6	1.5	0.5	0.3	1.4	0.6	0.8	0.7	0.7	1.3	0.5	0.7	0.7	0.5	0.5	2.5	0.4	0.5	0.6	0.6
Albumin	4	4	4.5	3.5	4	3.6	3.4	4	4	3.6	4	3.5	4	3.5	4.1	3.7	4.1	4	4.5	3.3	3.9	2.7	4	4.1	4.5	4.3	4.2	3.8	4.1	4.2	4.1	3.5	3	3.8	3.5	4.2	3.8

## Sheet: Fig 4 C
	Entecavir																				Tenofovir
Pre-vaccinate	3.8775	1.575	1.695	2.785	1.385	3.635	5.1925	1.2025	2.5125	1.19	25.2525	1.3425	1.2425	1.2575	1.2825	1.215	1.2875	2.36625	1.3975	1.4375	1.85	5.26	1.39	2.55	2.01	3.67	3.79	2.5	1.51	5.97	2.15	1.17	2.14	1.14	1.13	1.27	1.99	1.56	1.24	1.28
1st 3W	3.105	1.365	1.4925	2.5375	5.7775	3.5125	4.39	1.79	35.143	30.803	36.495	1.4725	4.425	1.4425	1.5125	1.285	1.7225	3.525	3.985	1.5475	1.67	4.7	1.4	3.72	1.66	3.37	4.1	2.54	1.77	5.41	2.63	1.33	5.83	1.6	90	7.77	9.02	9.34	1.45	10.95
2nd pre	5.2175	2.425	1.86			8.96		2.24875								3.01125			23.8625		6.21	3.56	3.13								3.76	1.41		6.32
2nd 3W	38.7525	1.95375	3.33125	13.5962	26.5063	237	380.988	2.41375	1556.88	3146.5	328.575	142.65	587.087	25.3038	5.59625	2.125	27.72	1605	222.15	34.83	9.41	29.54	94.83	914.63	135.74	8.41	2.81	3.03	44.59	12.53	62.15	3.23	3593.88	27.13	2437.5	539.31	249.28	1293	18.59	959.63
2nd 5W			3.33125		507.025					2241.88	255.938	284		19.93			51.435	724.525	906.05						303.09	61.12		59.59	277.88	131.75					1112.88	763.38		581.96		402.8
3rd	3097.75	243	2.58	150.84	423	2134.13	1021.5	3.56	2913.88	2533.38	999.25	1978.75		269.45	93.04	2.17	99.63			152.33	205	1064.5	1502.63	4663.5		290.56	4.9	540.23		1235.38	2057	133.81	5792.88		3664.13		260.74	1508.88	487.66
6M	1284.88		3	220.31	1150.13		416.09								16.27		393.89			973.38				1913	487.78	245.41	9.33			1235.38	320.88	103.56			3664.13				983.88

## Sheet: Fig 4 D
	Before breakthrough infection												After breakthrough infection												Before breakthrough infection with HBV												After breakthrough infection with HBV
AST	19	23	17	42	19	26	21	20	28	30	22		17	22	28	41	21	37	17	24	24	65	25		22	24	82	19	24	20	20	33	22	41	22	24	43	25	24	23	22	17	18	32	17	52	26	22
ALT	7	14	5	11	10	29	6	15	20	24	17		6	12	8	26	9	49	6	15	15	38	17		24	17	55	15	9	6	15	27	11	16	22	9	41	18	9	20	11	8	10	34	9	26	27	8
PT(%)	93.2	91.4	86.4	67.4	87.5	96.8	109	94.9	103.9	118.4	105.9		113.6	94.9	77.1	58.3	89	93.2	109	100.6	109	100.6	104.9		89.7	47.4	86	133.4	84.9	113.6	104.9	137.9	94.9	86.7	111.2	76	104.7	42.6	75.3	120.3	93.2	102.3	106.9	105.8	88.1		86.7	77.1
PT(INR)	1.03	1.04	1.07	1.24	1.06	1.02	0.96	1.03	0.98	0.93	0.97		0.95	1.03	1.13	1.36	1.05	1.03	0.96	1	0.97	1	0.97		1.05	1.56	1.07	0.87	1.08	0.95	0.97	0.87	1.03	1.07	0.96	1.14	0.98	1.71	1.15	0.91	1.03	0.99	0.96	0.97	1.06		1.07	1.13
ALB	4	4	3.6	2.9	4.6	4.2	2.8	4.2	4.5	3.6	4.2		3.8	4	2.7	3	4.1	4.1	3.7	4.2	4.4	3.8	4.2		3.6	4.1	3.8	4	3.9	4	4.5	4.2	4.4	3.4	4.2	4.1	3.9	4.2	3.6	3.8	3.7	4.1	3.9	4.1	4.1		4.4	4.1
Total bilirubin	0.7	0.8	0.3	1.6	0.5	0.9	1	1	1	0.4	1.3		0.4	0.6	0.2	2.3	0.5	1	0.3	0.9	1.2	0.7	1.1		1.3	0.6	0.8	0.5	1	0.3	0.7	0.7	0.5	0.6	0.5	0.9	0.7	0.7	0.8	0.4	1	0.4	1.1	0.8	0.5		0.5	0.7
